# Supplementary material
Source: MDPI journal article supplement (https://www.mdpi.com/2218-0532/92/2/22)
Supplement: s1 [file s1]

---

# Supplementary Materials: Stability-Indicating UPLC-PDA-QDa Methodology for Carvedilol and Felodipine in Fixed-Dose Combinations Using AQbD Principles

Jesús Alberto Afonso Urich, Viktoria Marko, Katharina Boehm, Raymar Andreina Lara Garcia, Anna Fedorko, Sharareh Salar-Behzadi and Dalibor Jeremic.

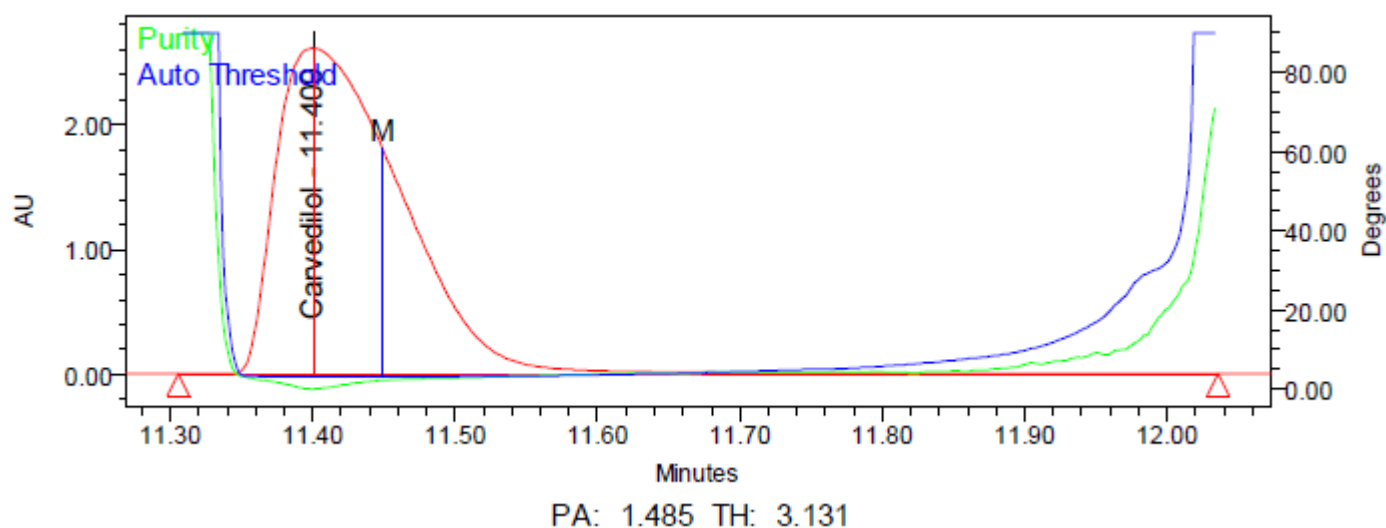

Figure S1. Purity plot of Carvedilol on forced degradation (control)

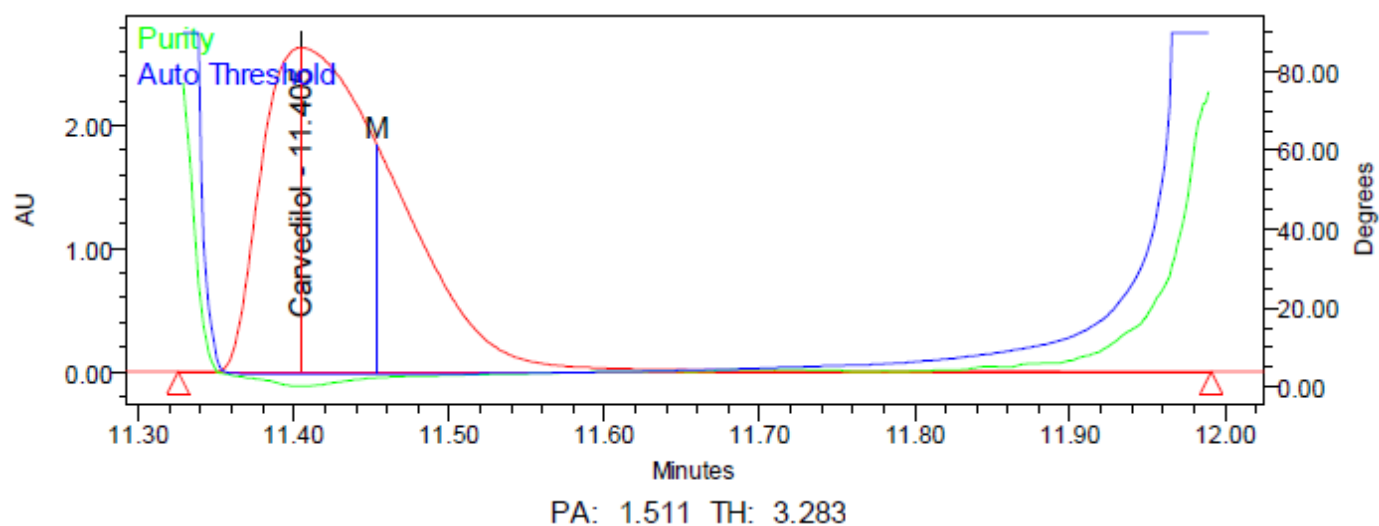

Figure S2. Purity plot of Carvedilol on forced degradation (acid)

---

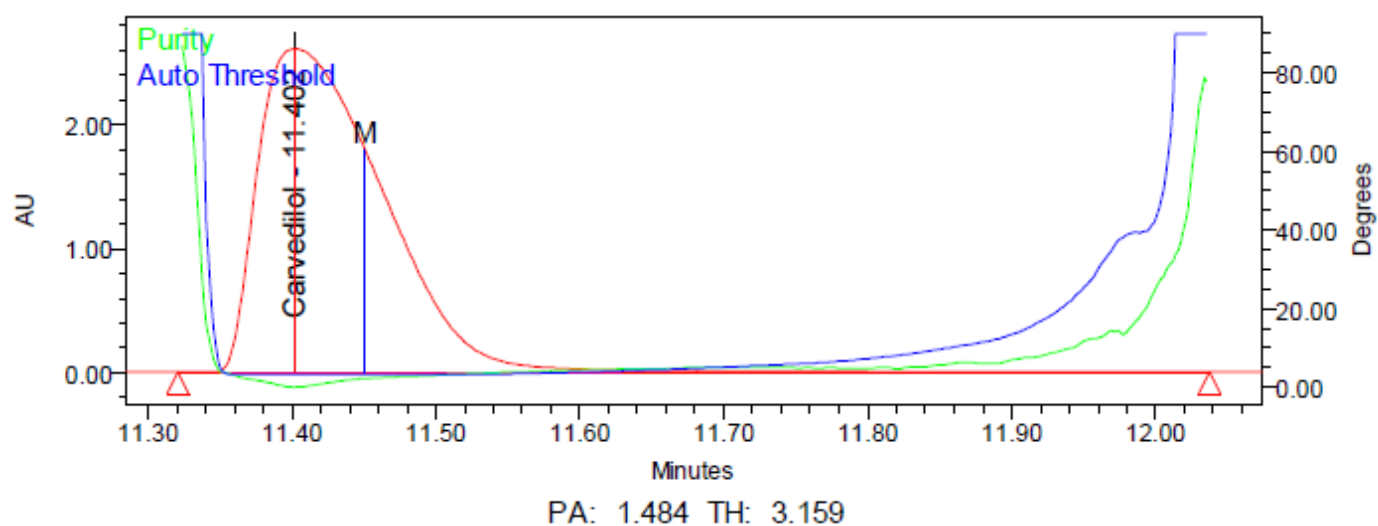

Figure S3. Purity plot of Carvedilol on forced degradation (basic)

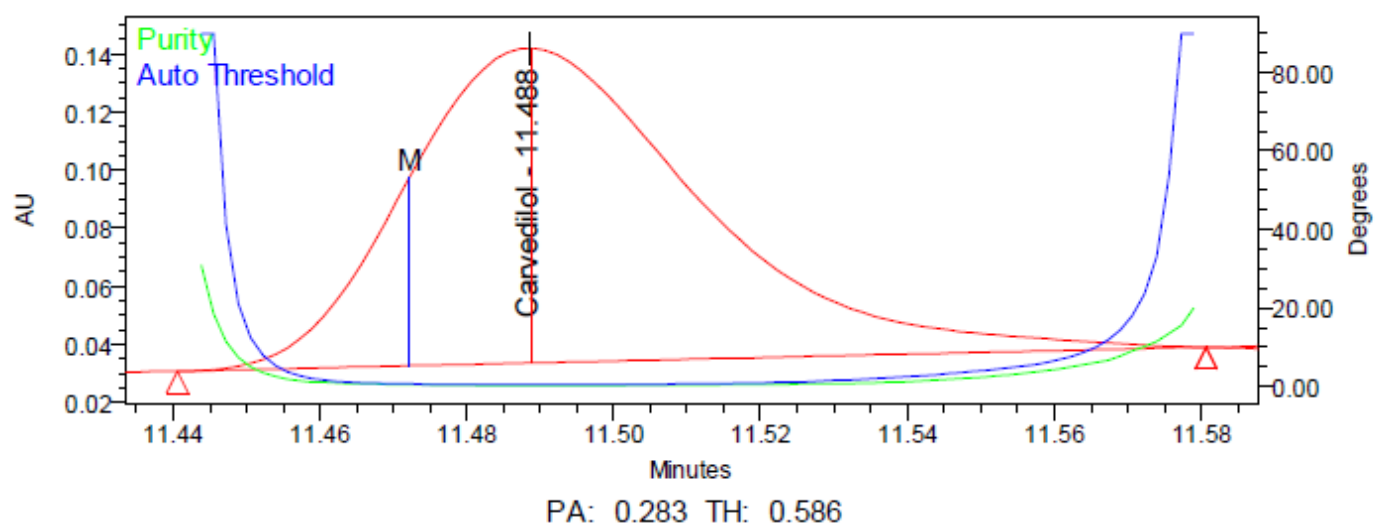

Figure S4. Purity plot of Carvedilol on forced degradation (oxidative)

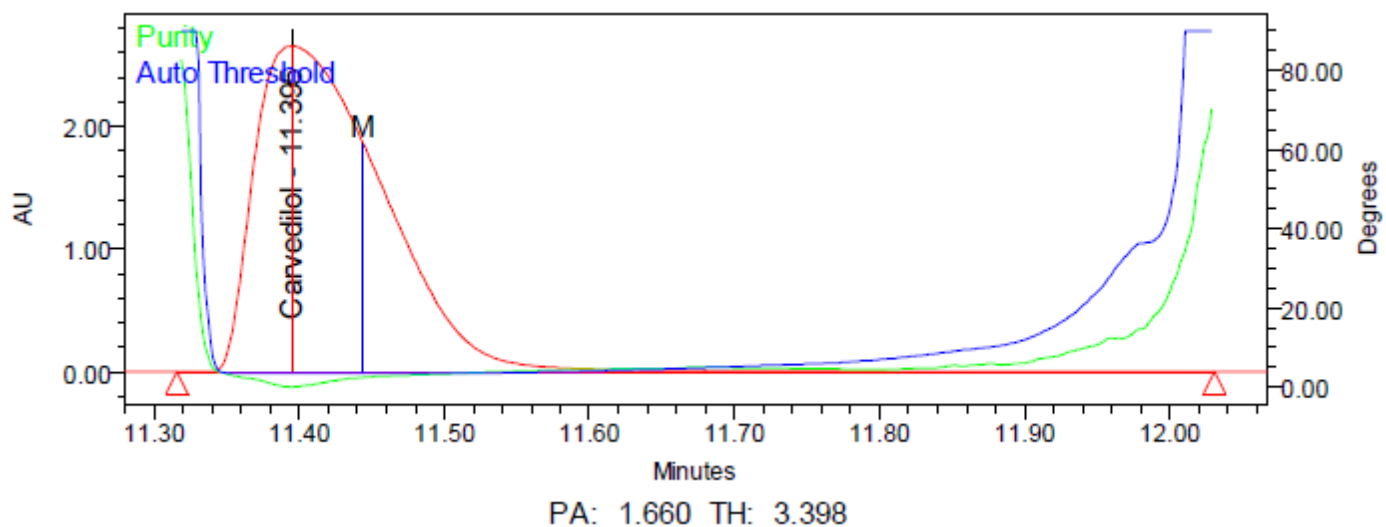

Figure S5. Purity plot of Carvedilol on forced degradation (thermal)

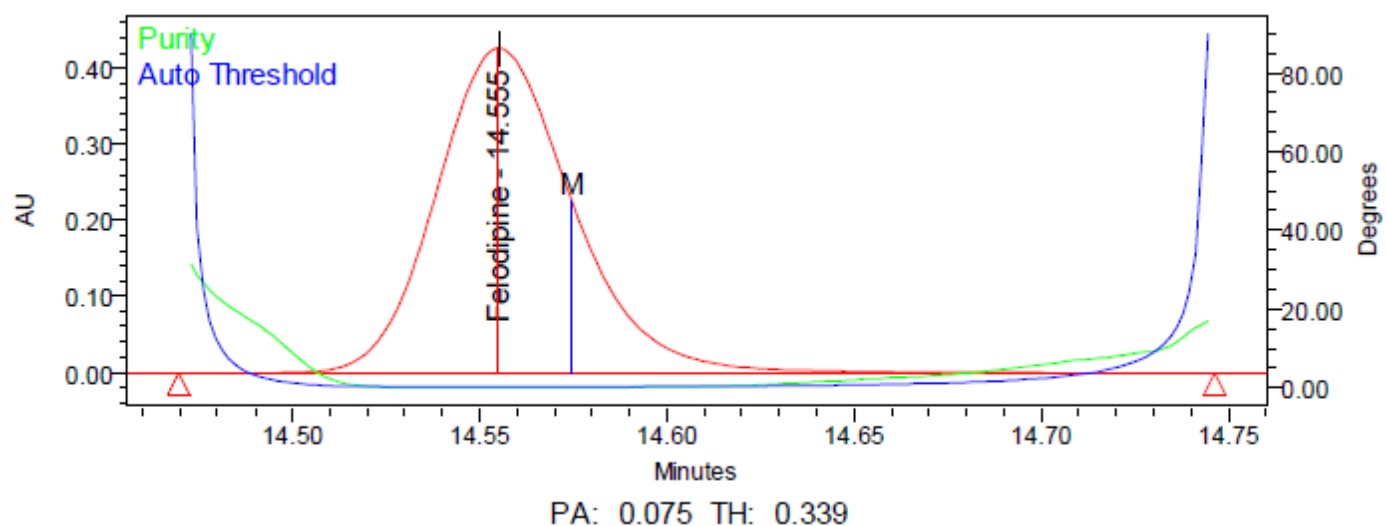

Figure S6. Purity plot of Felodipine on forced degradation (control)

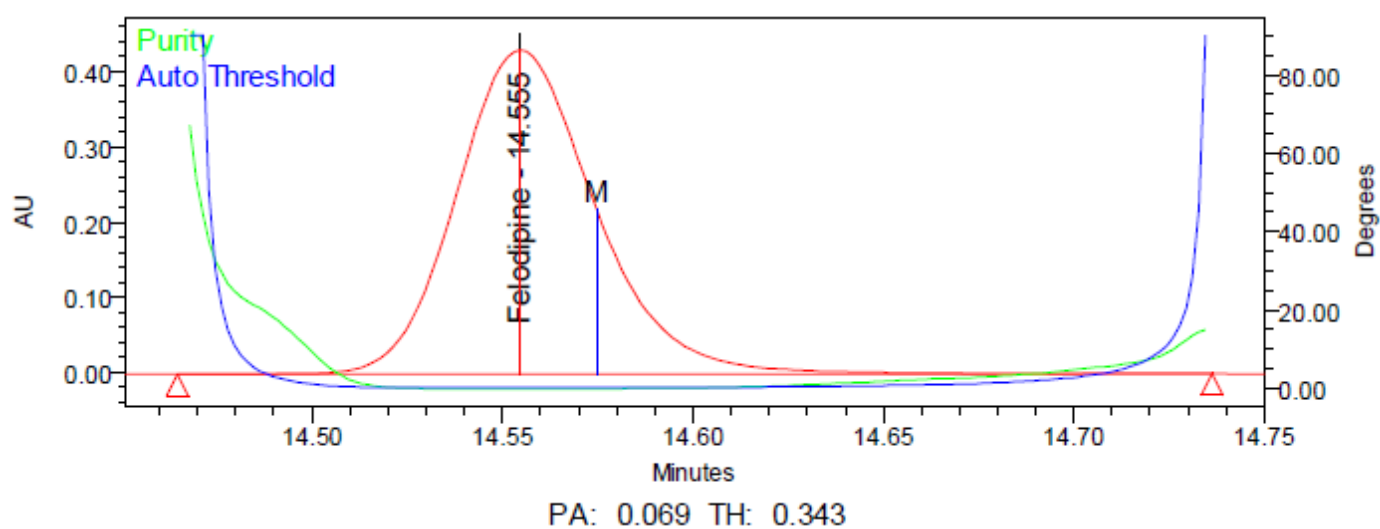

Figure S7. Purity plot of Felodipine on forced degradation (acid)

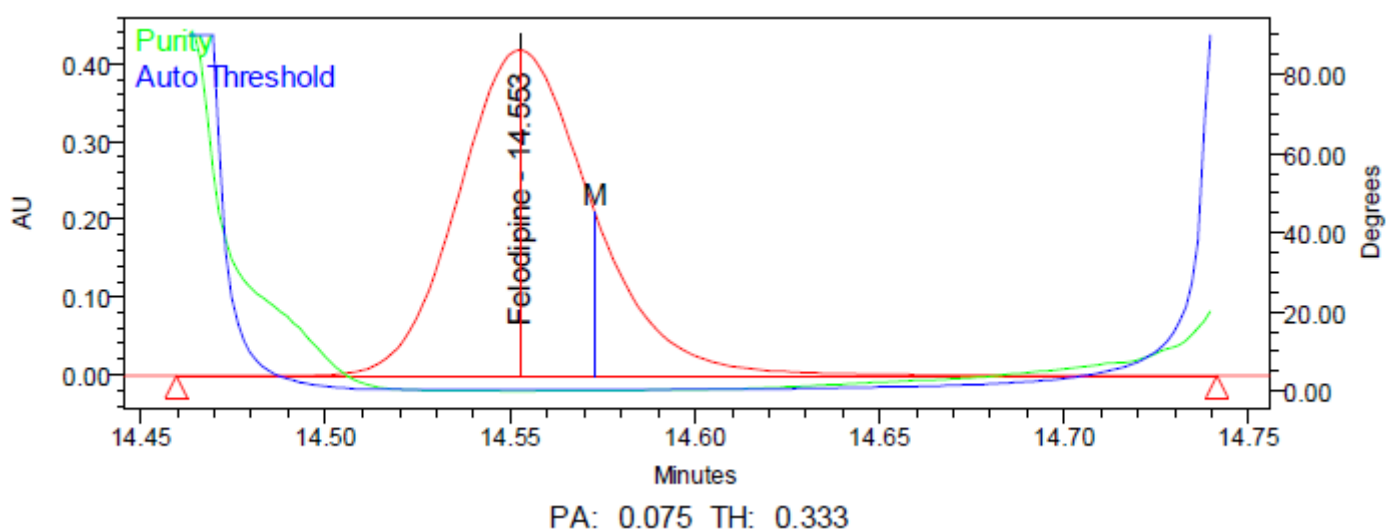

Figure S8. Purity plot of Felodipine on forced degradation (basic)

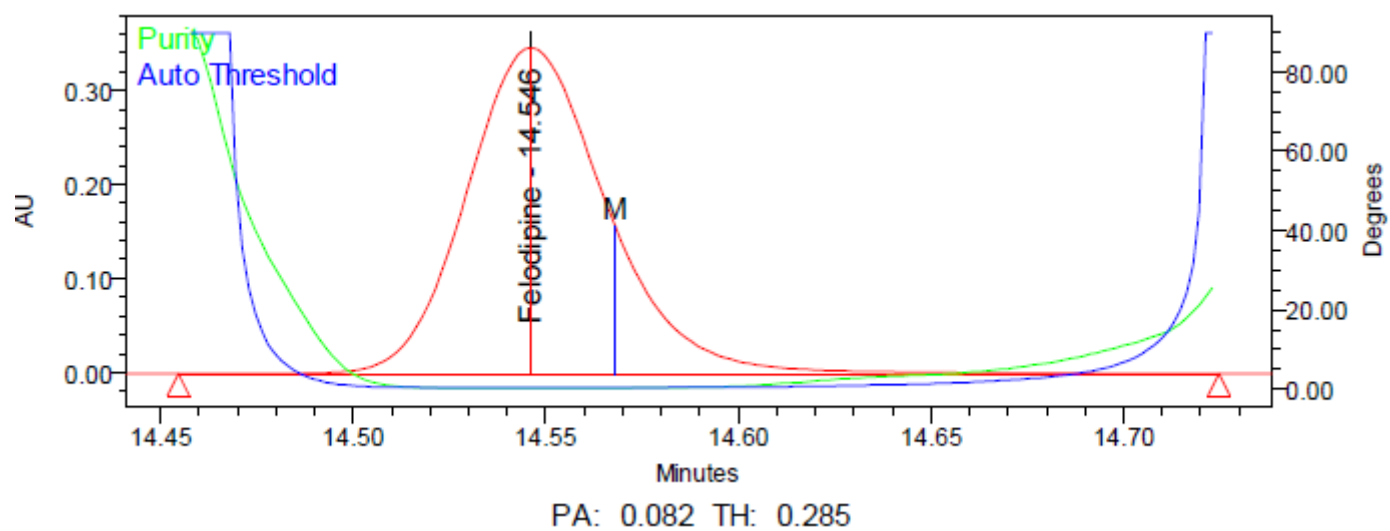

Figure S9. Purity plot of Felodipine on forced degradation (oxidative)

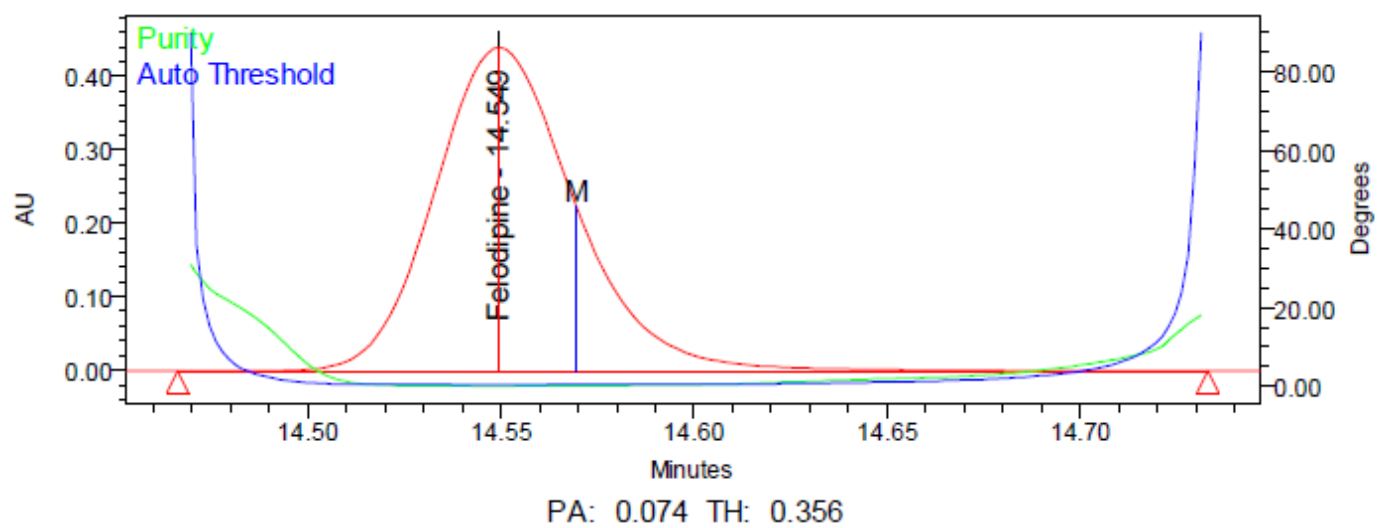

Figure S10. Purity plot of Felodipine on forced degradation (thermal)

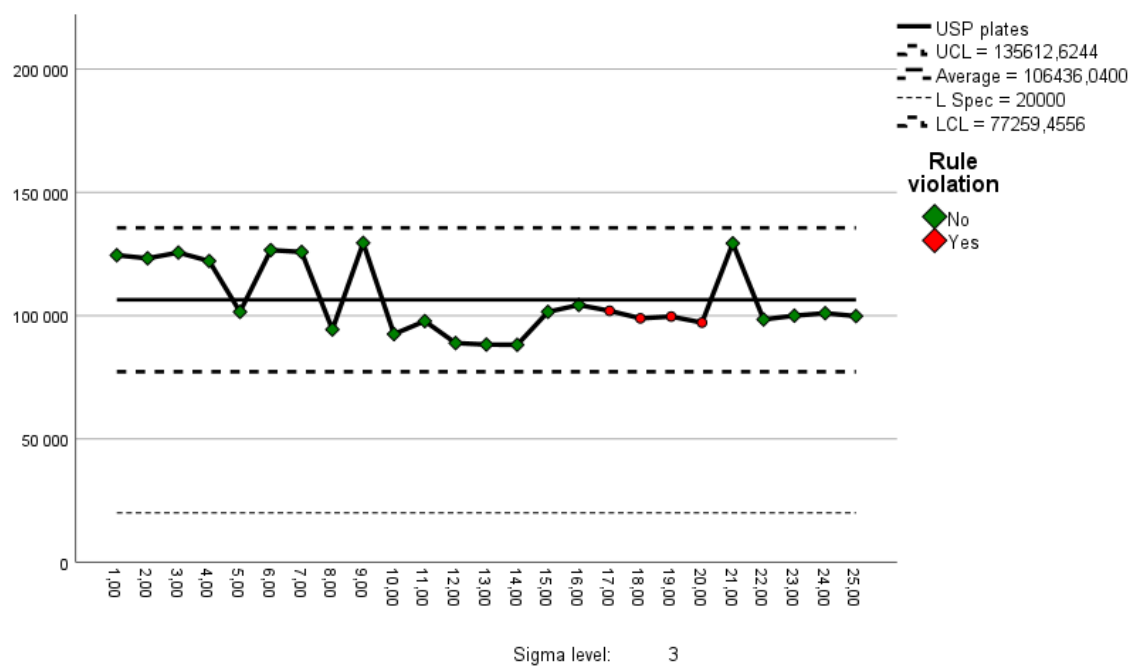

Figure S11 CAV USP plate: X-mR control chart - individual values at sigma level of 3

(Points 17,18,19 and 20: 8 consecutive points below the center line. Cpk: 2,98 (90%CI 2,16-3,80); Ppk: 2,02 (90%CI 1,53-2,51))

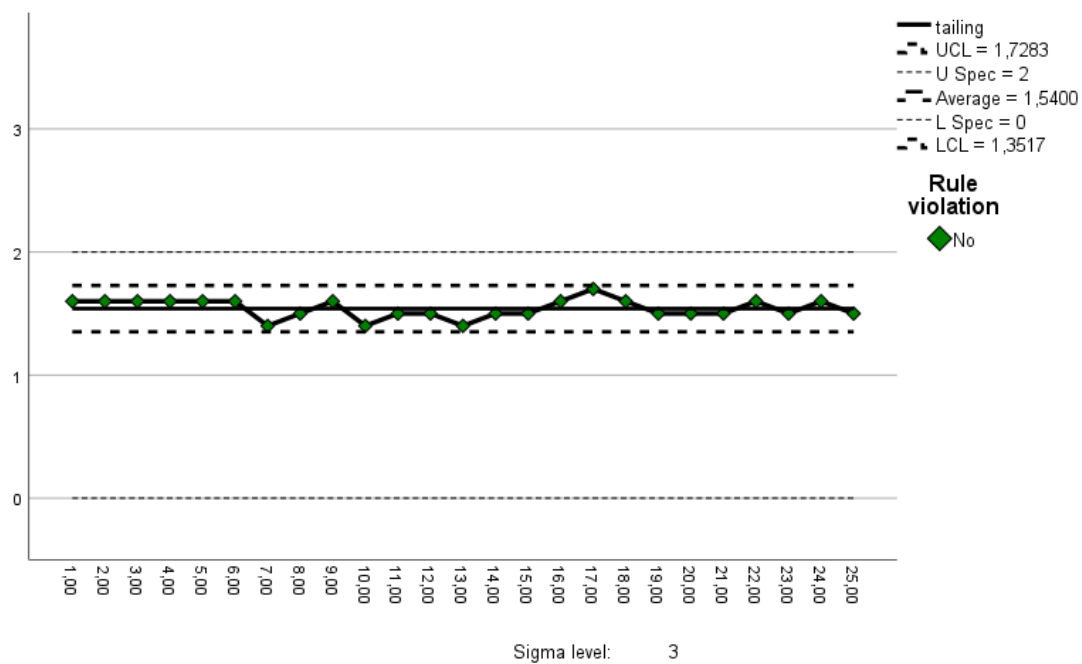

Figure S12 CAV tailing: X-mR control chart - individual values at sigma level of 3.no rules were violated. Cpk: 2,97 (90%CI 2,15-3,79); Ppk: 2,01 (90%CI 1,52-2,50)

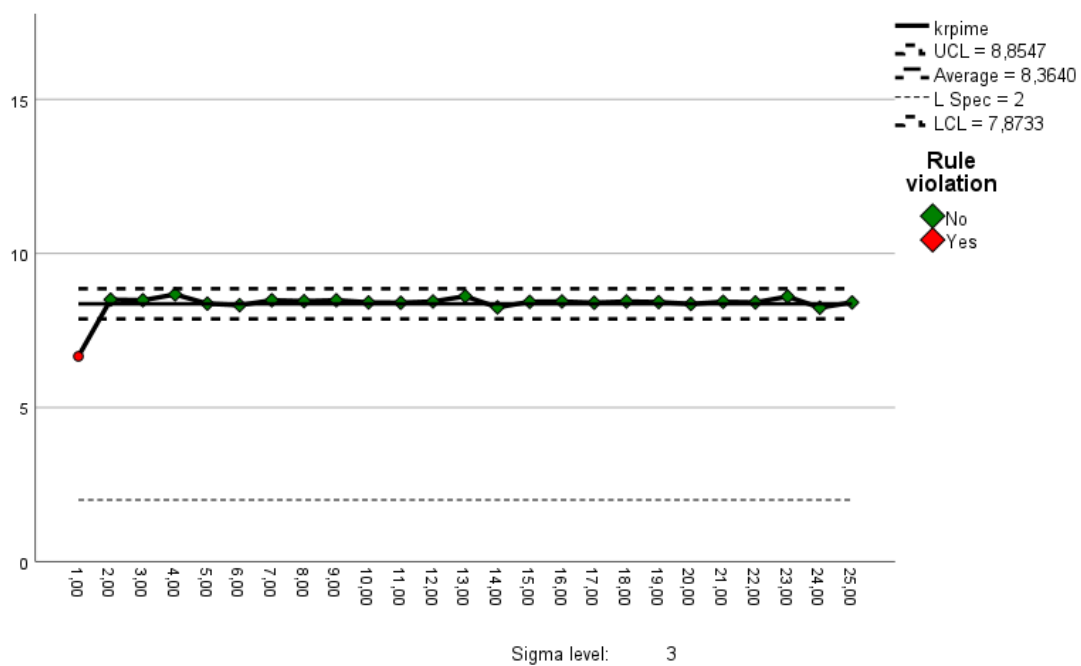

Figure S13 CAV capacity factor: X-mR control chart - individual values at sigma level of 3

(Point 1: less then -3 sigma. Cpk: 8,31 (90%CI 6,06-10,59); PpK: 5,77 (90%CI 4,39-7,14))

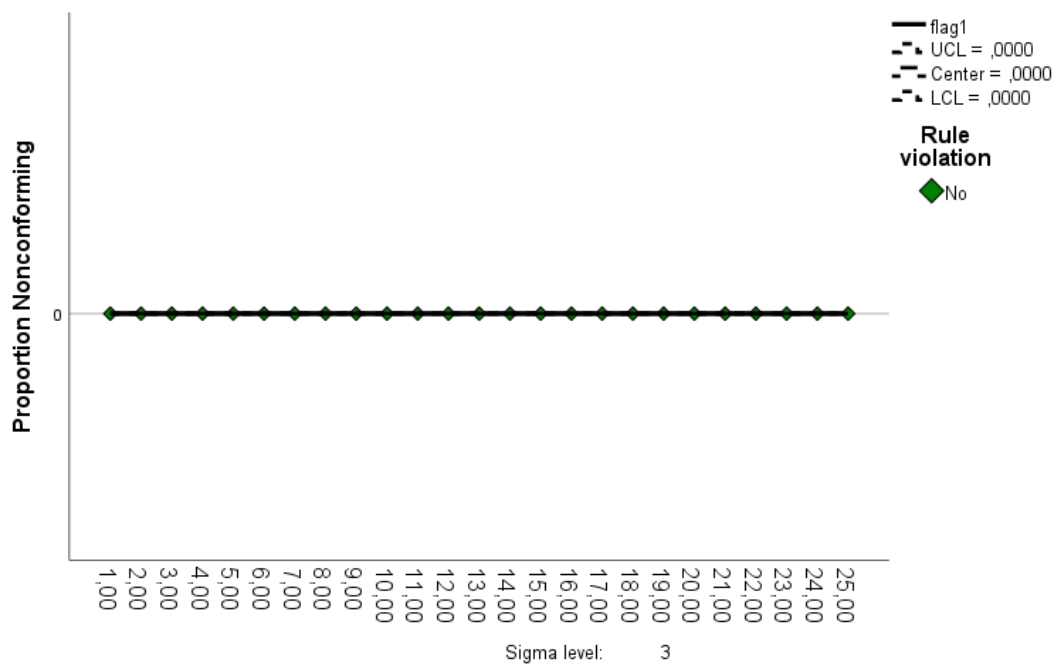

Figure S14 CAV flag: SPchart - at sigma level of 3

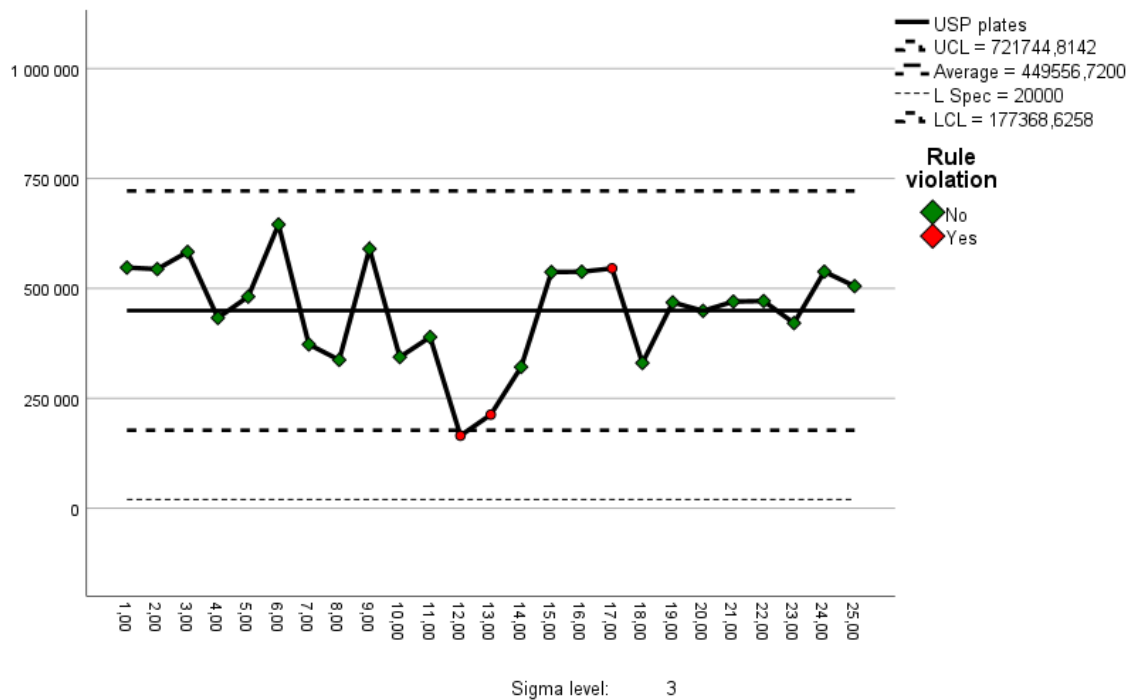

Figure S15 FLP USP plate: X-mR control chart - individual values at sigma level of 3

(Point 12: less than -3 sigma; Point 13: 2 points out of the last 3 below -2sigma; Point 17: 6 points in a row trending up; Cpk: 1,43 (90%CI 1,02-1,84); PpK: 1,21 (90%CI 0,91-1,52))

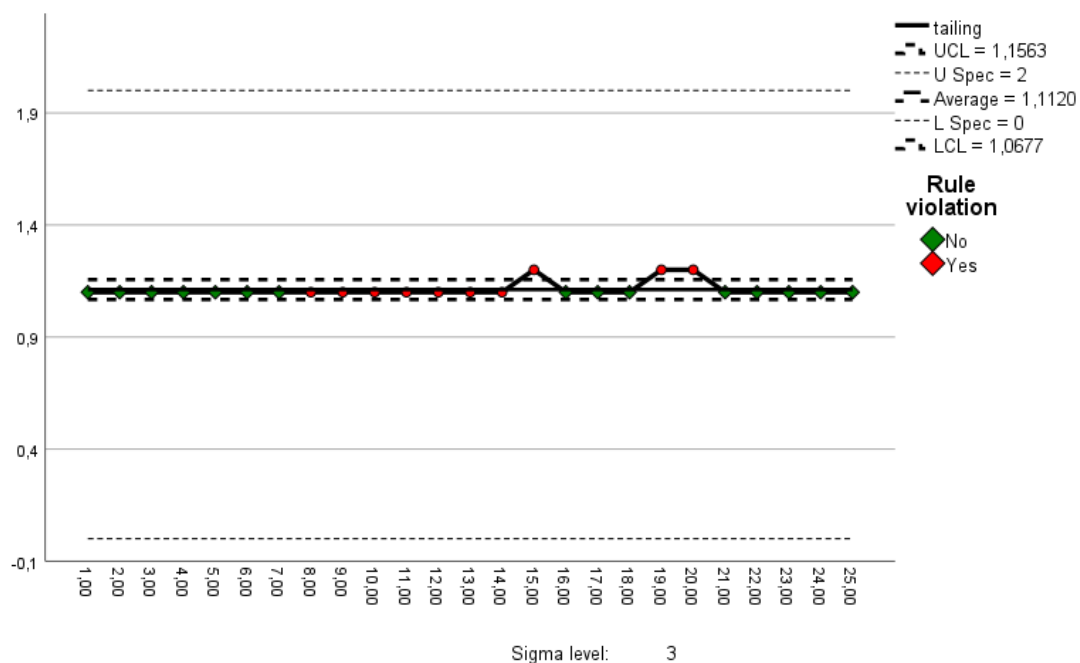

Figure S16 FLP tailing: X-mR control chart - individual values at sigma level of 3

(Points 8,9,10,11,12,13,14: 8 consecutive points below the center line; Points 15,19,20: greater than +3 sigma; Cpk: 17,21 (90%CI 12,49-21,93); PpK: 8,92 (90%CI 6,80-11,05))

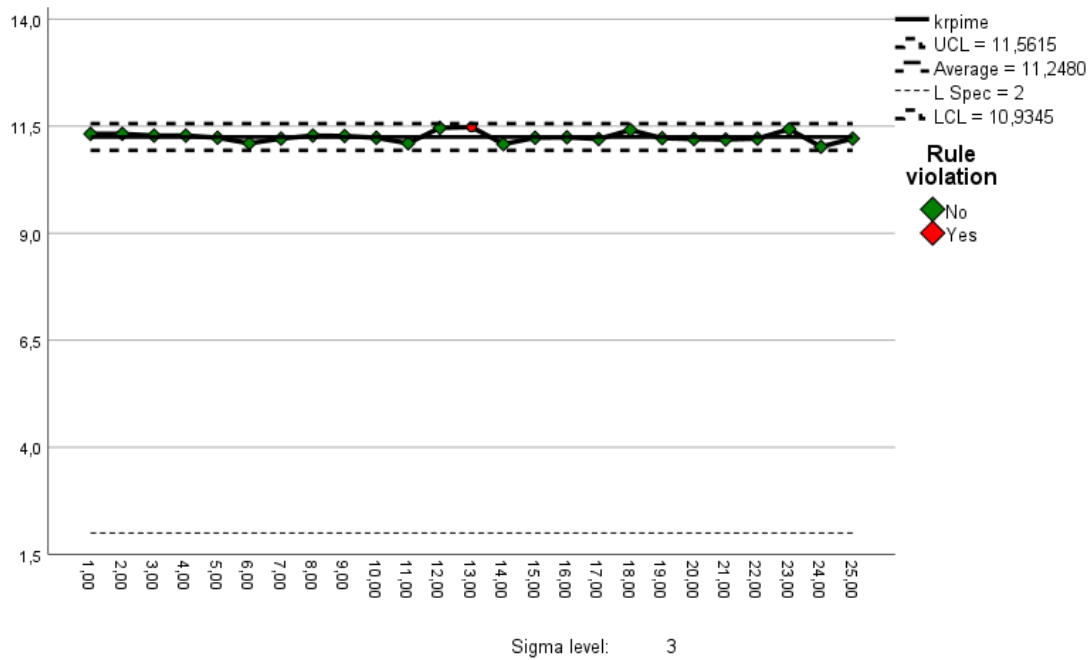

Figure S17 FLP capacity factor: X-mR control chart - individual values at sigma level of 3

(Point 13: 2 points out of the last 3 above +2 sigma; Cpk: 27,79 (90%CI 20,17-35,41); PpK: 27,12 (90%CI 20,68-33,55))

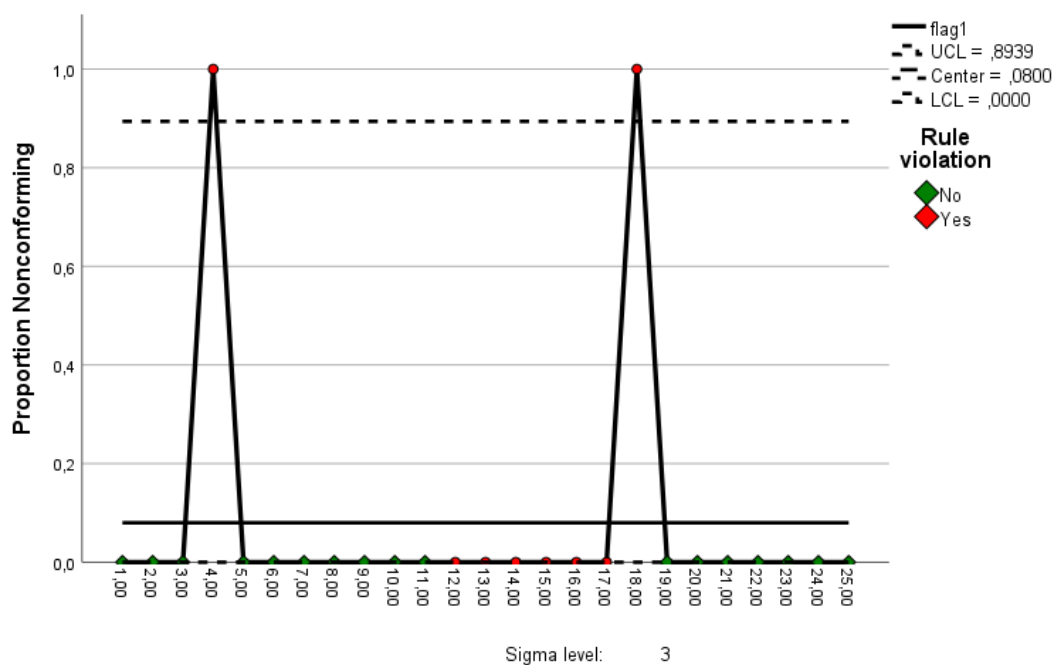

Figure S18 FLP flag: SPchart at sigma level of 3

Table S1. Chromatographic feature results from robustness test from method validation for CAV.

| Stability Solution (h)    |        | Column Temperature (°C) |        | Flow (mL/min) |        | Mobile phase buffer pH |        | Gradient % |        |
|---------------------------|--------|-------------------------|--------|---------------|--------|------------------------|--------|------------|--------|
| 0                         | 72     | 37                      | 39     | 0.19          | 0.21   | 4.3                    | 4.7    | 88         | 92     |
| Assay Concentration (ppm) |        |                         |        |               |        |                        |        |            |        |
| 236.05                    | 238.98 | 239.25                  | 238.19 | 241.29        | 239.33 | 239.45                 | 241.69 | 238.22     | 235.21 |
| 242.9                     | 247.73 | 246.97                  | 244.73 | 247.99        | 248.57 | 245.5                  | 249.45 | 245.63     | 242.47 |
| 249.49                    | 251.72 | 251.39                  | 248.51 | 252.93        | 253.36 | 249.99                 | 252.31 | 251.37     | 247    |
| 240.6                     | 243.71 | 246.21                  | 244.37 | 245.75        | 243.82 | 241.94                 | 245.55 | 244.06     | 239.77 |
| 255.11                    | 257.65 | 257.39                  | 256.97 | 258.81        | 258.4  | 258.47                 | 257.56 | 257.3      | 255.65 |
| 253.71                    | 256.25 | 255.17                  | 254.32 | 256.66        | 255.8  | 253.69                 | 255.35 | 254.53     | 251.69 |
| Tailing                   |        |                         |        |               |        |                        |        |            |        |
| 1.60                      | 1.6    | 1.6                     | 1.6    | 1.6           | 1.5    | 1.5                    | 1.3    | 1.6        | 1.5    |
| 1.60                      | 1.6    | 1.6                     | 1.6    | 1.5           | 1.5    | 1.5                    | 1.5    | 1.6        | 1.5    |
| 1.50                      | 1.6    | 1.6                     | 1.6    | 1.6           | 1.5    | 1.5                    | 1.5    | 1.6        | 1.6    |
| 1.60                      | 1.5    | 1.6                     | 1.6    | 1.6           | 1.6    | 1.5                    | 1.5    | 1.6        | 1.5    |
| 1.60                      | 1.5    | 1.7                     | 1.7    | 1.5           | 1.6    | 1.4                    | 1.4    | 1.7        | 1.6    |
| 1.60                      | 1.5    | 1.7                     | 1.6    | 1.5           | 1.6    | 1.5                    | 1.4    | 1.6        | 1.6    |
| USP Plates                |        |                         |        |               |        |                        |        |            |        |
| 101392                    | 99936  | 103394                  | 102033 | 99690         | 101041 | 98674                  | 129234 | 99500      | 104755 |
| 101358                    | 100240 | 104337                  | 102133 | 100134        | 101387 | 96690                  | 130652 | 98815      | 105818 |
| 101527                    | 99936  | 103697                  | 101980 | 99755         | 100741 | 99170                  | 129408 | 98494      | 105326 |
| 101537                    | 99913  | 104409                  | 101898 | 100338        | 101427 | 97169                  | 131430 | 98727      | 106151 |
| 101466                    | 100511 | 104081                  | 101949 | 99682         | 101660 | 100038                 | 131895 | 98875      | 106317 |
| 101633                    | 99929  | 103362                  | 102019 | 99975         | 101695 | 97569                  | 131249 | 98974      | 106064 |
| Capacity (k')             |        |                         |        |               |        |                        |        |            |        |
| 8.5                       | 8.5    | 6.6                     | 6.6    | 8.7           | 8.3    | 8.4                    | 8.5    | 6.6        | 8.5    |
| 8.5                       | 8.5    | 6.6                     | 6.6    | 8.7           | 8.3    | 8.4                    | 8.5    | 6.6        | 8.5    |



Table S2. Chromatographic feature results from robustness test from method validation for FLP.

| Stability Solution (h)    |        | Column Temperature (°C) |        | Flow (mL/min) |        | Mobile phase buffer pH |        | Gradient % |        |
|---------------------------|--------|-------------------------|--------|---------------|--------|------------------------|--------|------------|--------|
| 0                         | 72     | 37                      | 39     | 0.19          | 0.21   | 4.3                    | 4.7    | 88         | 92     |
| Assay Concentration (ppm) |        |                         |        |               |        |                        |        |            |        |
| 138.69                    | 138.71 | 139.34                  | 139.85 | 140.82        | 139.23 | 141.94                 | 139.12 | 139.41     | 141.35 |
| 97.12                     | 96.69  | 97.53                   | 97.5   | 97.34         | 97.4   | 97.63                  | 97.2   | 97.82      | 97.9   |
| 88.73                     | 88.5   | 88.77                   | 88.28  | 89.28         | 88.99  | 90.06                  | 88.95  | 89.25      | 90.03  |
| 100.13                    | 100    | 100.79                  | 101.63 | 101.52        | 100.6  | 101.71                 | 100.47 | 100.89     | 102.1  |
| 101.03                    | 100.86 | 101.29                  | 101.83 | 102.11        | 101.26 | 103.26                 | 101.4  | 101.9      | 103.75 |
| 88.52                     | 88.09  | 88.5                    | 89.23  | 88.93         | 88.09  | 89.16                  | 88.37  | 88.33      | 90.05  |
| Tailing                   |        |                         |        |               |        |                        |        |            |        |
| 1.2                       | 1.1    | 1.2                     | 1.2    | 1.1           | 1.1    | 1.2                    | 1.1    | 1.1        | 1.2    |
| 1.2                       | 1.1    | 1.1                     | 1.1    | 1.1           | 1.1    | 1.2                    | 1.1    | 1.1        | 1.2    |
| 1.2                       | 1.1    | 1.1                     | 1.2    | 1.1           | 1.1    | 1.2                    | 1.1    | 1.1        | 1.2    |
| 1.2                       | 1.1    | 1.1                     | 1.1    | 1.1           | 1.1    | 1.2                    | 1.1    | 1.1        | 1.2    |
| 1.2                       | 1.1    | 1.1                     | 1.1    | 1.1           | 1.1    | 1.2                    | 1.1    | 1.1        | 1.2    |
| 1.2                       | 1.1    | 1.2                     | 1.1    | 1.1           | 1.1    | 1.2                    | 1.1    | 1.1        | 1.2    |
| USP Plates                |        |                         |        |               |        |                        |        |            |        |
| 526589                    | 492859 | 515845                  | 516702 | 413724        | 531609 | 444308                 | 451876 | 336970     | 532904 |
| 526440                    | 492437 | 519919                  | 542128 | 419448        | 530371 | 438997                 | 456465 | 321442     | 538868 |
| 529413                    | 493469 | 524943                  | 528913 | 417311        | 531169 | 442629                 | 461743 | 334318     | 523805 |
| 530696                    | 495240 | 530179                  | 538232 | 418233        | 532636 | 442129                 | 465655 | 320281     | 530434 |
| 529700                    | 495485 | 535267                  | 537286 | 415922        | 530107 | 450984                 | 468589 | 321807     | 530312 |
| 528338                    | 496410 | 537445                  | 533949 | 414228        | 531042 | 450998                 | 455902 | 325000     | 535845 |
| Capacity (k')             |        |                         |        |               |        |                        |        |            |        |
| 8.8                       | 11.1   | 8.8                     | 8.8    | 11.3          | 10.9   | 11.1                   | 11.1   | 11.3       | 11     |
| 8.8                       | 11.1   | 8.8                     | 8.8    | 11.3          | 10.9   | 11.1                   | 11.1   | 11.3       | 11     |



Table S3. The coefficient table for the final reduced model for each substance and response. A, being the mobile pH and the hard-to-change-factor, B the column type and C the organic modifier. The 2-Factor interactions A[1]B[1], A[2]B[1], A[3]B[1], A[1]B[2], A[2]B[2], A[3]B[2], A[1]B[3], A[2]B[3] and A[3]B[3] were non-significant for neither of the cases and were left out in the table. P-value shading: p<0,05 0,05≤p<0,1 p≥0,1.

| API | Intercept                              | A[1]    | A[2]     | A[3]     | B[1]     | B[2]     | B[3]     | C        | A[1]C    | A[2]C  | A[3]C  | B[1]C    | B[2]C    | B[3]C    |
|-----|----------------------------------------|---------|----------|----------|----------|----------|----------|----------|----------|--------|--------|----------|----------|----------|
| CAV | Log10(Tailing -1.00)                   | -0.1610 | -0.0513  | -0.1639  | 0.0871   | -0.1011  | 0.1948   | -0.0162  |          |        |        |          |          |          |
|     | p-values                               |         | 0.0053   | 0.0053   | 0.0053   | 0.0006   | 0.0006   | 0.0006   |          |        |        |          |          |          |
|     | Log10(Resolution -0.50)                | 0.4780  | -0.2447  | 0.6651   | -0.1467  |          |          | 0.0568   | -        | -      | 0.1672 |          |          |          |
|     | p-values                               |         | < 0.0001 | < 0.0001 | < 0.0001 |          |          | 0.2125   | 0.0086   | 0.0086 | 0.0086 |          |          |          |
|     | Capacity Factor                        | 10.3790 | -0.5203  | 1.5512   | -0.2440  | 0.3057   | -0.0139  | 0.2432   | 1.3757   | -      | -      | -        | -        | 0.3090   |
|     | p-values                               |         | < 0.0001 | < 0.0001 | < 0.0001 | < 0.0001 | < 0.0001 | < 0.0001 | 0.0631   | 0.1234 | 0.0766 | 0.0161   | 0.0648   |          |
|     | Log10(USP Plate Count -0.50)           | 4.6580  | -0.0708  | 0.4932   | -0.0993  | 0.2387   | -0.0055  | -0.0842  | 0.1035   | 0.3016 | 0.3016 | 0.3016   | 0.0001   | 0.0001   |
|     | p-values                               |         | 0.0921   | 0.0921   | 0.0921   | 0.0012   | 0.0012   | 0.0012   | 0.0019   |        |        |          |          |          |
|     | 1/Sqrt(Purity Flag 0/1 + 0.00)         | 23.6860 |          |          |          | 8.1297   | -0.2403  | -0.8718  | -        |        |        | 3.8718   | 6.2797   | 0.5444   |
|     | p-values                               |         |          |          |          | 0.0941   | 0.0941   | 0.0941   | 4.2492   |        |        | 0.0368   | 0.0368   | 0.0368   |
|     | Log10(Purity flag forces degr. + 0.00) | -1.7490 | 0.2817   | -0.5327  | -0.2457  | -0.3579  | 0.6328   | -0.0919  | 0.3245   |        |        |          |          |          |
|     | p-values                               |         | 0.9342   | 0.9342   | 0.9342   | 0.3862   | 0.3862   | 0.3862   | 0.1548   |        |        |          |          |          |
|     | ( Tailing)^-2.3                        | 0.5970  |          |          |          | 0.1002   | 0.0508   | 0.0386   |          |        |        |          |          |          |
|     | p-values                               |         |          |          |          | 0.0096   | 0.0096   | 0.0096   |          |        |        |          |          |          |
| FLP | Resolution                             | 84.1070 | 9.1396   | -40.9265 | 15.8935  |          |          |          |          |        |        |          |          |          |
|     | p-values                               |         | 0.0003   | 0.0003   | 0.0003   |          |          |          |          |        |        |          |          |          |
|     | Capacity Factor                        | 12.1560 |          |          |          | 0.7369   | 0.0528   | -0.4450  | 1.0928   |        |        | -        | -        | 0.2848   |
|     | p-values                               |         |          |          |          | < 0.0001 | < 0.0001 | < 0.0001 | < 0.0001 |        |        | < 0.0001 | < 0.0001 | < 0.0001 |
|     | Log10(USP Plate Count)                 | 5.2360  |          |          |          | 0.3355   | 0.4739   | -0.0590  | 0.0470   |        |        |          |          |          |
|     | p-values                               |         |          |          |          | < 0.0001 | < 0.0001 | < 0.0001 | 0.0471   |        |        |          |          |          |

|                                                       |          |          |               |         |             |          |               |             |  |        |        |             |
|-------------------------------------------------------|----------|----------|---------------|---------|-------------|----------|---------------|-------------|--|--------|--------|-------------|
| 1/Sqrt(Purity Flag with<br>0/1 + 0.00)                | 22.4360  |          |               |         | 9.1870      | 9.1870   | 3.0623        | -<br>1.5312 |  | 1.5312 | 1.5312 | -<br>4.5935 |
| p-values                                              |          |          |               |         | <<br>0.0001 | < 0.0001 | < 0.0001      | 0.1489      |  | 0.0794 | 0.0794 | 0.0794      |
| 1/(Felo: Prutiy flag<br>forced degradation +<br>0.00) | 805.2690 | 135.5870 | -<br>348.8530 | 58.6228 | 77.2172     | 127.7060 | -<br>280.6130 |             |  |        |        |             |
| p-values                                              |          | 0.0280   | 0.0280        | 0.0280  | 0.0130      | 0.0130   | 0.0130        |             |  |        |        |             |

Table S4. The coefficient table for the final reduced model for each substance and response. A, being methanol concentration, b the column temperature and C the flow rate. The 2-Factor interaction AB and BC were non-significant for neither of the cases and were left out in the table. P-value shading: p<0,05 0,05≤p<0,1 p≥0,1.

4  
5

| API | Response                                    | Intercept  | Block [1]   | A           | B           | C          | AC         | A <sup>2</sup> | B <sup>2</sup> | C <sup>2</sup> |
|-----|---------------------------------------------|------------|-------------|-------------|-------------|------------|------------|----------------|----------------|----------------|
| CAV | Tailing                                     | 1.9157     | -0.1681     |             | 0.0962      |            |            |                | 0.0662         |                |
|     | p-values                                    |            |             |             | 0.2493      |            |            |                | 0.0090         |                |
|     | 1/Sqrt(Resolution)                          | 0.6694     | 0.0369      |             |             | -0.0007    |            |                |                | -0.1214        |
|     | p-values                                    |            |             |             |             | 0.9862     |            |                |                | 0.0624         |
|     | Capacity F.                                 | 11.2496    | -0.0684     | -0.0165     | -0.2016     | -1.2423    |            | -0.1775        |                | 0.61393        |
|     | p-values                                    |            |             | 0.7356      | < 0.0001    | < 0.0001   |            | 0.0457         |                | < 0.0001       |
|     | USP PC                                      | 78471.5000 | -5364.1100  | 11116.0000  |             |            |            |                |                |                |
|     | p-values                                    |            |             | 0.0013      |             |            |            |                |                |                |
|     | Logit[Prob(purity flag=1)]                  | -43.2126   | 15.1923     | -0.5493     | 0.5493      | 29.1189    |            |                |                |                |
|     | p-values                                    | < 0.0001   | 0.1044      | 0.4620      | 0.4620      | 0.0001     |            |                |                |                |
| FLP | Logit[Prob(purity flag<br>(degradation)=1)] | -43.4098   | 14.3378     |             |             | 29.0719    |            |                |                |                |
|     | p-values                                    | < 0.0001   | 0.1185      |             |             | 0.0001     |            |                |                |                |
|     | (Tailing)^-2.81                             | 0.7003     | -0.0376     | -0.0838     |             | -0.0687    | 0.1481     |                |                |                |
|     | p-values                                    |            |             | 0.09570     |             | 0.1698     | 0.0129     |                |                |                |
|     | (Resolution)^2.81                           | 8806.7100  | -424.2790   | -529.408    |             |            |            | -2349.2100     |                |                |
|     | p-values                                    |            |             | 0.3646      |             |            |            | 0.0151         |                |                |
|     | (Capacity F.)^-1.5                          | 0.019762   | 0.000504341 | 9.19885E-05 | 0.00058748  | 0.00179306 | 0.00104276 | 0.000798013    |                |                |
|     | p-values                                    |            |             | 0.5251      | 0.0001      | < 0.0001   | < 0.0001   | 0.0013         |                |                |
|     | Sqrt(USP PC)                                | 691.047    | -223.584    | 142.654     | -70.858     | 83.0146    |            |                |                |                |
|     | p-values                                    |            |             | 0.0007      | 0.0607      | 0.0383     |            |                |                |                |
|     | Logit[Prob(purity flag=1)]                  | -15.178    | 12.6821     | -1.09436    | 2.65331E-15 | -1.09436   |            |                |                |                |
|     | p-values                                    | 0.0003     | 0.2687      | 0.1504      |             | 0.1504     |            |                |                |                |

|                                             |          |           |          |          |           |
|---------------------------------------------|----------|-----------|----------|----------|-----------|
| Logit[Prob(purity flag<br>(degradation)=1)] | -3.25931 | -0.250235 | -1.43193 | -1.07072 | -0.273009 |
| p-values                                    | 0.0002   | 0.7404    | 0.0119   | 0.0535   | 0.6368    |
